# Supplementary material
Source: publisher site journal article supplement (https://www.degruyterbrill.com/publication/isbn/9783110218176/downloadAsset/9783110218176_Contents.pdf)
Supplement: Supplementary file 1 [file 9783110218176_Contents.pdf]

# Contents

|                                                                                                                                                         |            |
|---------------------------------------------------------------------------------------------------------------------------------------------------------|------------|
| Introduction                                                                                                                                            | vii        |
| Notation                                                                                                                                                | xi         |
| <b>1 Impulsive Differential Equations</b>                                                                                                               | <b>1</b>   |
| 1.1 General Characterization of Systems of Impulsive Differential Equations                                                                             | 1          |
| 1.2 Linear Systems                                                                                                                                      | 23         |
| <b>2 Impulsive Differential Inclusions</b>                                                                                                              | <b>42</b>  |
| 2.1 Differential Inclusions with Fixed Times of Pulse Action                                                                                            | 42         |
| 2.2 Differential Inclusions with Nonfixed Times of Pulse Action                                                                                         | 48         |
| 2.3 Examples                                                                                                                                            | 56         |
| <b>3 Linear Impulsive Differential Inclusions</b>                                                                                                       | <b>66</b>  |
| 3.1 Statement of the Problem. Theorem on Existence and Uniqueness                                                                                       | 66         |
| 3.2 Stability of Solutions of Linear Impulsive Differential Inclusions                                                                                  | 72         |
| 3.3 Periodic Solutions of Linear Impulsive Differential Inclusions                                                                                      | 88         |
| 3.4 Linear Differential Equations with Pulse Action at Indefinite Times                                                                                 | 119        |
| <b>4 Linear Systems with Multivalued Trajectories</b>                                                                                                   | <b>124</b> |
| 4.1 Differential Equations with Hukuhara Derivative                                                                                                     | 124        |
| 4.2 Approximation of the Integral Funnel of a Linear Differential Inclusion with the Help of Systems of Differential Equations with Hukuhara Derivative | 130        |
| 4.3 Linear Differential Equations with $\pi$ -Derivative                                                                                                | 151        |
| 4.4 Extension of the Space $\text{conv}(\mathbb{R}^n)$ for $n = 1$                                                                                      | 155        |
| 4.5 Approximation of the Integral Funnel of a Linear Differential Inclusion with the Help of Systems of Differential Equations with $\pi$ -Derivative   | 159        |
| <b>5 Method of Averaging in Systems with Pulse Action</b>                                                                                               | <b>169</b> |
| 5.1 Oscillating System with One Degree of Freedom                                                                                                       | 169        |
| 5.2 Systems with Fixed Times of the Pulse Action                                                                                                        | 194        |
| 5.3 Systems with Nonfixed Times of the Pulse Action                                                                                                     | 204        |

---

|          |                                                                                     |     |
|----------|-------------------------------------------------------------------------------------|-----|
| <b>6</b> | <b>Averaging of Differential Inclusions</b>                                         | 220 |
| 6.1      | Averaging of Inclusions with Pulses at Fixed Times . . . . .                        | 220 |
| 6.2      | Krasnosel'skii–Krein Theorem for Differential Inclusions . . . . .                  | 229 |
| 6.3      | Averaging of Inclusions with Pulses at Nonfixed Times . . . . .                     | 241 |
| 6.4      | Averaging of Impulsive Differential Equations with Hukuhara<br>Derivative . . . . . | 250 |
| <b>7</b> | <b>Differential Equations with Discontinuous Right-Hand Side</b>                    | 257 |
| 7.1      | Motions and Quasimotions . . . . .                                                  | 257 |
| 7.2      | Impulsive Motions and Quasimotions . . . . .                                        | 270 |
| 7.3      | Euler Quasibroken Lines . . . . .                                                   | 273 |
| <b>A</b> | <b>Some Elements of Set-Valued Analysis</b>                                         | 276 |
| <b>B</b> | <b>Differential Inclusions</b>                                                      | 283 |
|          | References                                                                          | 295 |
|          | Index                                                                               | 305 |
